# Supplementary material for: A Novel Mineral-like Copper Phosphate Chloride with a Disordered Guest Structure: Crystal Chemistry and Magnetic Properties
Source: MDPI journal article supplement (doi:10.3390/ma15041411), 2022-02-14
Supplement: s1 [file s1]

Supplementary Information

# A Novel Mineral-like Copper Phosphate Chloride with a Disordered Guest Structure: Crystal Chemistry and Magnetic Properties

Galina Kiriukhina <sup>1,2</sup>, Olga Yakubovich <sup>1</sup>, Larisa Shvanskaya <sup>1,3</sup>, Anatoly Volkov <sup>1</sup>, Olga Dimitrova <sup>1</sup>, Sergey Simonov <sup>4</sup>, Olga Volkova <sup>3,5,6</sup> and Alexander Vasiliev <sup>3,5,6\*</sup>

<sup>1</sup> Faculty of Geology, Lomonosov Moscow State University, 119991 Moscow, Russia; g-biralo@yandex.ru (G.K.); yakubovich.olga320@gmail.com (O.Y.); lshvanskaya@mail.ru (L.S.); toljha@yandex.ru (A.V.); dimitrova@list.ru (O.D.)

<sup>2</sup> Institute of Experimental Mineralogy RAS, 142432 Chernogolovka, Russia

<sup>3</sup> Quantum Functional Materials Laboratory, National University of Science and Technology “MISiS”, 119049 Moscow, Russia; os.volkova@yahoo.com

<sup>4</sup> Institute of Solid State Physics RAS, 142432 Chernogolovka, Russia; simonov@issp.ac.ru

<sup>5</sup> Faculty of Physics, Lomonosov Moscow State University, 119991 Moscow, Russia

<sup>6</sup> Institute of Physics and Technology, Ural Federal University, 620002 Ekaterinburg, Russia

\* Correspondence: anvas2000@yahoo.com

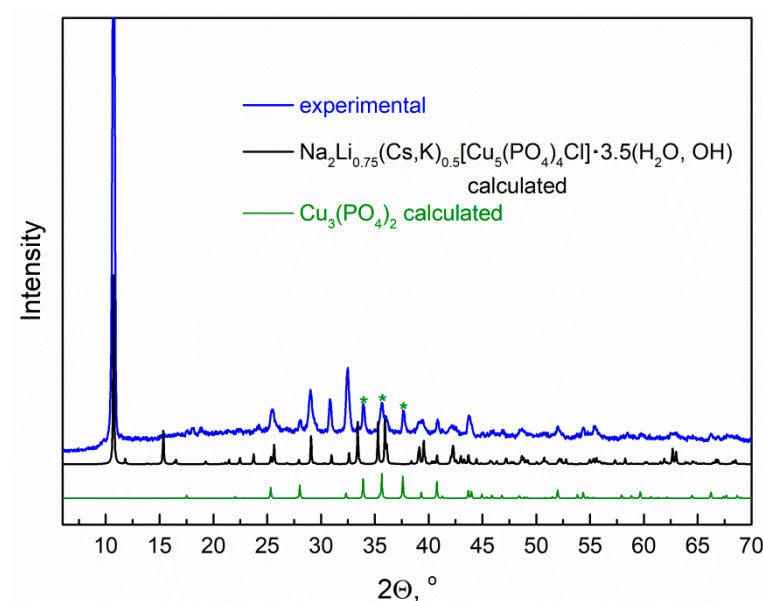

**Figure S1.** Experimental and calculated powder XRD patterns. Peak marked with asterisk corresponds to the impurity phase,  $\text{Cu}_3(\text{PO}_4)_2$ . The powder XRD analysis was performed by an ADP-2 diffractometer using  $\text{CoK}\alpha$  radiation,  $\lambda = 1.7903 \text{ \AA}$ .

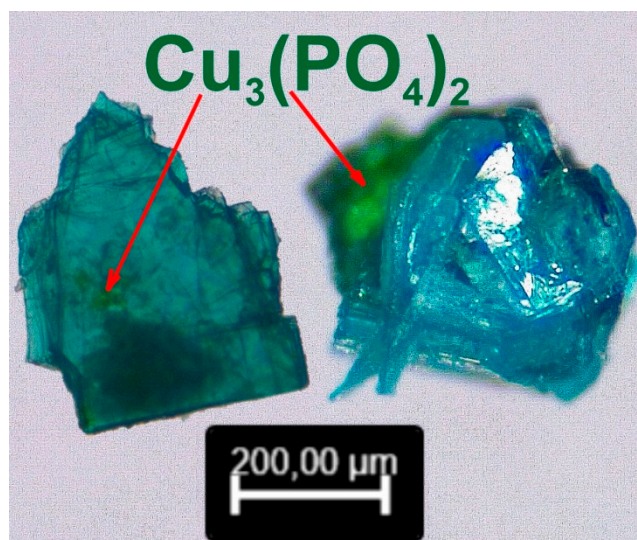

**Figure S2.** Intergrowth of  $\text{Na}_2\text{Li}_{0.75}(\text{Cs},\text{K})_{0.5}[\text{Cu}_5(\text{PO}_4)_4\text{Cl}] \cdot 3.5(\text{H}_2\text{O},\text{OH})$  (blue) and  $\text{Cu}_3(\text{PO}_4)_2$  phase (green).

**Table S1.** Fractional atomic coordinates and isotropic or equivalent isotropic displacement parameters ( $\text{\AA}^2$ ) for  $\text{Na}_2\text{Li}_{0.75}(\text{Cs},\text{K})_{0.5}[\text{Cu}_5(\text{PO}_4)_4\text{Cl}] \cdot 3.5(\text{H}_2\text{O},\text{OH})$ .

|     | <i>x</i>    | <i>y</i>     | <i>z</i>     | $U_{\text{iso}}^*/U_{\text{eq}}$ | Occ.       |
|-----|-------------|--------------|--------------|----------------------------------|------------|
| Cu1 | 0.59537(6)  | 0.5000       | 0.20041 (11) | 0.0041 (2)                       | 1          |
| Cu2 | 0.71493(6)  | 1.0000       | 0.50829 (11) | 0.0048 (2)                       | 1          |
| Cu3 | 0.71529(6)  | 1.0000       | 0.96873 (11) | 0.0054 (2)                       | 1          |
| Cu4 | 0.71506(4)  | 0.77095 (8)  | 0.73848 (8)  | 0.00537 (18)                     | 1          |
| Cl1 | 0.63652(12) | 1.0000       | 0.7144 (2)   | 0.0096 (4)                       | 1          |
| P1  | 0.66048(9)  | 0.70784 (16) | 0.42766 (16) | 0.0048 (3)                       | 1          |
| P2  | 0.66045(9)  | 0.70858 (16) | 1.01322 (16) | 0.0049 (3)                       | 1          |
| Cs1 | 0.5000      | 0.8213 (5)   | 0.5000       | 0.0473 (13)                      | 0.334 (6)  |
| K1  | 0.5000      | 0.894 (3)    | 0.5000       | 0.0473 (18)                      | 0.195 (11) |
| O12 | 0.5000      | 1.0000       | 0.5000       | 0.07 (3)*                        | 0.24 (6)   |
| Na2 | 0.6077 (4)  | 1.0000       | 0.2053 (8)   | 0.0104 (15)                      | 0.980 (3)  |
| Cu6 | 0.711 (3)   | 1.0000       | 0.289 (6)    | 0.0104 (15)                      | 0.020 (3)  |
| Na1 | 0.6110 (2)  | 0.5000       | 0.6953 (4)   | 0.0098 (8)                       | 0.979 (3)  |
| Cu5 | 0.404 (3)   | 0.5000       | 0.471 (6)    | 0.0098 (8)                       | 0.021 (3)  |
| O1  | 0.7276 (2)  | 0.6423 (5)   | 0.3866 (4)   | 0.0052 (9)                       | 1          |
| O2  | 0.7272 (2)  | 0.6426 (5)   | 1.0987 (4)   | 0.0058 (9)                       | 1          |
| O3  | 0.5954 (2)  | 0.6434 (5)   | 1.0567 (4)   | 0.0078 (9)                       | 1          |
| O4  | 0.5962 (2)  | 0.6428 (5)   | 0.3426 (5)   | 0.0074 (9)                       | 1          |
| O5  | 0.6606 (2)  | 0.8620 (5)   | 0.3956 (4)   | 0.0071 (6)                       | 1          |
| O6  | 0.6602 (2)  | 0.6767 (5)   | 0.8591 (4)   | 0.0077 (9)                       | 1          |
| O7  | 0.6605 (2)  | 0.8628 (5)   | 1.0452 (5)   | 0.0071 (9)                       | 1          |
| O8  | 0.6602 (2)  | 0.6777 (5)   | 0.5824 (4)   | 0.0071 (6)                       | 1          |
| O9  | 0.4775 (4)  | 0.5000       | 0.1629 (7)   | 0.0104 (14)                      | 1          |
| O11 | 0.5000      | 0.5000       | 0.5000       | 0.021 (2)                        | 1          |
| O10 | 0.5071 (4)  | 0.8408 (8)   | 0.1824 (12)  | 0.071 (3)                        | 1          |
| Li1 | 0.5000      | 0.806 (3)    | 1.0000       | 0.026 (10)                       | 0.74 (8)   |
| Cl2 | 0.591 (4)   | 1.0000       | 0.189 (9)    | 0.013 (17)*                      | 0.069 (13) |
| H1  | 0.466 (4)   | 0.433 (3)    | 0.114 (4)    | 0.02 (2)*                        | 1          |

**Table S2.** Interatomic distances for  $\text{Na}_2\text{Li}_{0.75}(\text{Cs},\text{K})_{0.5}[\text{Cu}_5(\text{PO}_4)_4\text{Cl}]\cdot 3.5(\text{H}_2\text{O},\text{OH})$ .

|                    |                      |                |                      |                      |                     |
|--------------------|----------------------|----------------|----------------------|----------------------|---------------------|
| Cu1 pyramid        |                      | Cu2 pyramid    |                      | Cu3 pyramid          |                     |
| Cu1 O4             | $1.963(4) \times 2$  | Cu2 O5         | $1.938(5) \times 2$  | Cu3 O7               | $1.933(4) \times 2$ |
| Cu1 O3             | $1.979(4) \times 2$  | Cu2 O1         | $1.962(4) \times 2$  | Cu3 O2               | $1.962(4) \times 2$ |
| Cu1 O9             | 2.255(7)             | Cu2 Cl1        | 2.708(2)             | Cu3 Cl1              | 2.691(3)            |
| Cu4 pyramid        |                      | P1 tetrahedron |                      | P2 tetrahedron       |                     |
| Cu4 O8             | 1.936(4)             | P1 O4          | 1.519(5)             | P2 O6                | 1.532(4)            |
| Cu4 O6             | 1.940(4)             | P1 O8          | 1.537(4)             | P2 O3                | 1.533(5)            |
| Cu4 O1             | 1.969(4)             | P1 O5          | 1.537(5)             | P2 O7                | 1.537(5)            |
| Cu4 O2             | 1.975(4)             | P1 O1          | 1.559(4)             | P2 O2                | 1.561(5)            |
| Cu4 Cl1            | 2.6944(15)           |                |                      |                      |                     |
| Cs1 polyhedron     |                      | K1 polyhedron  |                      | Na1 polyhedron       |                     |
| Cs1 O4             | $3.130(5) \times 2$  | K1 O10         | $3.162(13) \times 2$ | Na1 O8               | $2.338(5) \times 2$ |
| Cs1 O11            | 3.137(5)             | K1 Cl1         | $3.262(11) \times 2$ | Na1 O9               | 2.372(8)            |
| Cs1 O10            | $3.124(11) \times 2$ | K1 O5          | $3.44(2) \times 2$   | Na1 O6               | $2.436(5) \times 2$ |
| Cs1 O8             | $3.385(5) \times 2$  | K1 O4          | $3.57(2) \times 2$   | Na1 O11              | 2.632(4)            |
| Cs1 O5             | $3.452(4) \times 2$  |                |                      |                      |                     |
| Cs1 Cl1            | $3.553(3) \times 2$  |                |                      |                      |                     |
| Na2 trigonal prism |                      | Cu5 polyhedron |                      | Cu6 polyhedron       |                     |
| Na2 O5             | $2.385(8) \times 2$  | Cu5 O11        | 1.84(6)              | Cu6 O5               | $2.04(4) \times 2$  |
| Na2 O7             | $2.407(8) \times 2$  | Cu5 O8         | $2.15(3) \times 2$   | Cu6 O7               | $2.76(4) \times 2$  |
| Na2 O10            | $2.475(10) \times 2$ | Cu5 O4         | 2.29(4)              | Cu6 Cl2              | 2.36(9)             |
| Li tetrahedron     |                      |                |                      |                      |                     |
| Li O10             |                      |                |                      | $1.760(14) \times 2$ |                     |
| Li O3              |                      |                |                      | $2.44(2) \times 2$   |                     |

**Table S3.** Hydrogen-bond geometry ( $\text{\AA}$ ,  $^\circ$ ) for  $\text{Na}_2\text{Li}_{0.75}(\text{Cs},\text{K})_{0.5}[\text{Cu}_5(\text{PO}_4)_4\text{Cl}]\cdot 3.5(\text{H}_2\text{O},\text{OH})$ .

|                                |             |             |             |                     |
|--------------------------------|-------------|-------------|-------------|---------------------|
| $D\cdots H\cdots A$            | $D\cdots H$ | $H\cdots A$ | $D\cdots A$ | $D\cdots H\cdots A$ |
| O9—H1 $\cdots$ O3 <sup>i</sup> | 0.82 (1)    | 2.02 (3)    | 2.748 (7)   | 148 (6)             |

Symmetry code: (i)  $-x+1, -y+1, -z+1$
